# Supplementary material for: Candida Non-albicans and Non-auris Causing Invasive Candidiasis in a Fourth-Level Hospital in Colombia: Epidemiology, Antifungal Susceptibility, and Genetic Diversity
Source: MDPI journal article supplement (doi:10.3390/jof10050326), 2024-04-30
Supplement: s1 [file s1]

## Supplementary material

**Table S1.** Distribution, per species and per antifungal, of the minimum inhibitory concentration (MIC) values of the studied *Candida* isolates (n=68)

[illegible]

|     |                        |    |        |   |          |           |           |          |   |          |          |   |          |          |
|-----|------------------------|----|--------|---|----------|-----------|-----------|----------|---|----------|----------|---|----------|----------|
|     | <i>C. glabrata</i>     | 18 | 9.699  |   |          |           |           | 2        | 3 | <u>7</u> | 3        | 1 | <b>1</b> | <b>1</b> |
|     | <i>C. parapsilosis</i> | 29 | 1.240  |   | 5        | 3         | <u>12</u> | 3        | 2 | <b>1</b> | <b>3</b> |   |          |          |
|     | <i>C. tropicalis</i>   | 17 | 2.771  |   |          |           | 4         | <u>8</u> | 3 | <b>1</b> | -        | - | -        | <b>1</b> |
| AMB | <i>C. dubliniensis</i> | 4  | 0.2973 |   | <u>3</u> | 1         |           |          |   |          |          |   |          |          |
|     | <i>C. glabrata</i>     | 18 | 0.7349 | 1 | -        | 5         | <u>12</u> |          |   |          |          |   |          |          |
|     | <i>C. parapsilosis</i> | 29 | 0.500  | 1 | 3        | <u>20</u> | 5         |          |   |          |          |   |          |          |
|     | <i>C. tropicalis</i>   | 17 | 0.5886 | 1 | -        | <u>10</u> | 6         |          |   |          |          |   |          |          |

<sup>1</sup>The modal MIC for each distribution is underlined. Resistant isolates are in bold.

<sup>2</sup>AMB: Amphotericin-B; AND: anidulafungin; CAS: caspofungin; FC: 5-fluorocytosine; FZ: Fluconazole; IZ: Itraconazole; MF: Micafungin; PZ: Posaconazole, VOR: Voriconazole.

<sup>3</sup>GM: Geometric mean in µg/ml.

**Table S2.** Comparison of minimum inhibitory concentration values, per antifungal, between *Candida* species. Geometric mean MICs in µg/ml are compared and *p*-values for statistical significance are shown in parenthesis.

|     | <i>C. parapsilosis</i> vs.<br><i>C. glabrata</i> | <i>C. parapsilosis</i> vs.<br><i>C. tropicalis</i> | <i>C. glabrata</i> vs.<br><i>C. tropicalis</i> |
|-----|--------------------------------------------------|----------------------------------------------------|------------------------------------------------|
| AND | 0,5245 vs. 0,03937<br>(<0,0001)                  | 0,5245 vs. 0,02765<br>(<0,0001)                    | 0,03937 vs. 0,02765<br>(0,0372)                |
| MF  | 0,8064 vs. 0,01688<br>(<0,0001)                  | 0,8064 vs. 0,02655<br>(<0,0001)                    | 0,01688 vs. 0,02655<br>(0,0032)                |
| CAS | 0,2886 vs. 0,08505<br>(<0,0001)                  | 0,2886 vs. 0,02079<br>(<0,0001)                    | 0,08505 vs. 0,02079<br>(<0,0001)               |
| FC  | 0,07043 vs. 0,07577<br>(0,3839) <sup>ns</sup>    | 0,07043 vs. 0,2174<br>(0,6960) <sup>ns</sup>       | 0,07577 vs. 0,2174<br>(0,1623) <sup>ns</sup>   |
| PZ  | 0,03051 vs. 0,9259<br>(<0,0001)                  | 0,03051 vs. 0,2212<br>(<0,0001)                    | 0,9259 vs. 0,2212<br>(<0,0001)                 |
| VOR | 0,03278 vs. 0,3819<br>(<0,0001)                  | 0,03278 vs. 0,1879<br>(<0,0001)                    | 0,3819 vs. 0,1879<br>(0,0126)                  |
| IZ  | 0,06401 vs. 0,6062<br>(<0,0001)                  | 0,06401 vs. 0,2500<br>(<0,0001)                    | 0,6062 vs. 0,2500<br>(0,0004)                  |
| FZ  | 1,240 vs. 9,699<br>(<0,0001)                     | 1,240 vs. 2,771<br>(0,0104)                        | 9,699 vs. 2,771<br>(0,0001)                    |
| AMB | 0,50000 vs. 0,7349<br>(0,0011)                   | 0,50000 vs. 0,5886<br>(0,1673) <sup>ns</sup>       | 0,7349 vs. 0,5886<br>(0,1220) <sup>ns</sup>    |

AMB: Amphotericin-B; AND: anidulafungin; CAS: caspofungin; FC: 5-Fluorocytosine; FZ: Fluconazole; IZ: Itraconazole; MF: Micafungin; PZ: Posaconazole, VOR: Voriconazole.

ns: not significant
